# Supplementary material for: Transition metal-catalyzed deoxydehydration: missing pieces of the puzzle
Source: Royal Society of Chemistry journal article supplement (doi:10.1039/d1cy02083h), 2022-01-01
Supplement: d1cy02083h1.pdf [file d1cy02083h1.pdf]

## **Transition Metal-Catalyzed Deoxydehydration: Missing Pieces of the Puzzle**

Friederike C. Jentoft

Supporting Information

Calculation of turnover frequencies from information in the literature –  
to complement Table 10

*Cook and Andrews,<sup>1</sup> Glycerol DODH with PPh<sub>3</sub>*

From the text: “The prototype carbohydrate, glycerol, is also cleanly deoxydehydrated by PPh<sub>3</sub> to the corresponding alkene, allyl alcohol (67 turnovers in 23 h), in a biphasic, saturated solution in chlorobenzene at 125 °C”

$$TOF = \frac{67}{23 \text{ h}} = 2.9 \text{ h}^{-1}$$

*Yi et al.,<sup>2</sup> Glycerol DODH with glycerol*

Initial rate of formation of allyl alcohol read from Figure 1: about 0.75 mmol in 20 min

From Experimental Section: catalyst charge (methyltrioxidorhenium): 1.1 mmol

$$TOF = \frac{0.75 \text{ mmol} * 60 \text{ min}}{20 \text{ min} * \text{h} * 1.1 \text{ mmol}} = 2.0 \text{ h}^{-1}$$

*Raju et al.,<sup>3</sup> 1,2-Octanediol DODH with PPh<sub>3</sub>*

Initial rate of formation of 1-octene read from Figure 2: about 25% yield in 1 h

From text, the amount of catalyst is 2 mol%: “Initial catalytic reactions were performed with 2 mol% catalyst 2 at 180 °C in chlorobenzene with 1.1 equiv. triphenylphosphine as the reductant under an inert nitrogen atmosphere, that is, under similar conditions to those previously reported by Cook and Andrews for Cp\*ReO<sub>3</sub> in this reaction.[7] A profile of the reaction over time showed that it proceeded to completion within 15 h, and exclusively yielded octenes (1-octene/2-octene=1:0.05; Figure 2).”

$$TOF = \frac{0.25}{0.02 * 1 \text{ h}} = 12.5 \text{ h}^{-1}$$

*Liu et al.,<sup>4</sup> Hydrobenzoin DODH with 3-octanol*

Rate of hydrobenzoin concentration change from slope of linear fit in Figure 2b: 0.0007 M/s

Hydrobenzoin starting concentration from intercept of linear fit in Figure 2b: 0.54 M

From Figure 2 caption: 2.5 mmol hydrobenzoin and 0.05 mmol methyltrioxidorhenium

$$TOF = \frac{0.0007 \text{ M} * 2.5 \text{ mmol} * 3600 \text{ s}}{0.54 \text{ M} * \text{s} * 0.05 \text{ mmol} * h} = 233 \text{ h}^{-1}$$

Zhang et al.,<sup>5</sup> Mucic acid DODH with 3-pentanol

Initial rate of formation of muconic acid read from Figure 2 and from associated text: 65% converted with 98% selectivity within 4 h

From Experimental Section, Homogeneous DODH reactions, the amount of mucic acid is 1.0 mmol and the amount of rhenium catalyst is 0.05 mmol.

$$TOF = \frac{0.65 * 0.98 * 1 \text{ mmol}}{0.05 \text{ mmol} * 4 \text{ h}} = 3.2 \text{ h}^{-1}$$

Denning et al.,<sup>6</sup> Diethyltartrate DODH with  $H_2$

Data from Figure 3, linear portion of diethylfumarate concentration increase starting at about 3.5 h. Since the measurement is from our own laboratory, we fit the original data:

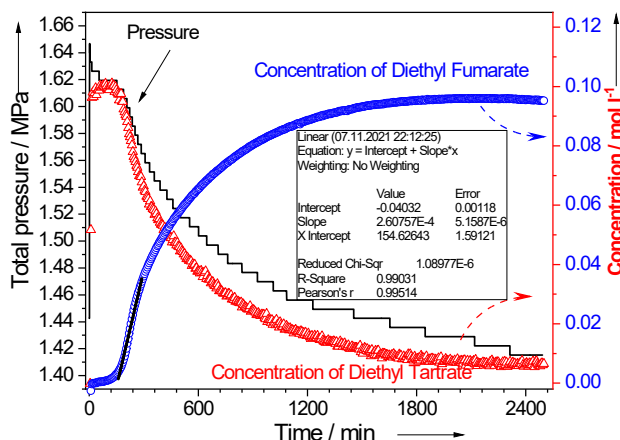

Initial rate of change in diethylfumarate concentration from slope of linear fit:  $2.6 * 10^{-4}$  M/min

From SI, the reaction volume is approximately 120 ml (assumed to be equal to amount solvent)

From the SI, the amount of  $ReO_x$ -C catalyst is 1.4 g.

From the Experimental Section, the rhenium content of the  $ReO_x$ -C catalyst is about 4 %.

The atomic weight of rhenium, 186.2 g/mol

$$TOF = \frac{2.6 * 10^{-4} \text{ M} * 0.12 \text{ L} * 60 \text{ min}}{\text{min} * h} \frac{186.2 \text{ g}}{1.4 \text{ g} * 0.04 * \text{mol}} = 6.2 \text{ h}^{-1}$$

## References

- (1) Cook, G. K.; Andrews, M. A. Toward Nonoxidative Routes to Oxygenated Organics: Stereospecific Deoxydehydration of Diols and Polyols to Alkenes and Allylic Alcohols Catalyzed by the Metal Oxo Complex (C<sub>5</sub>Me<sub>5</sub>)ReO<sub>3</sub>. *J. Am. Chem. Soc.* **1996**, *118* (39), 9448–9449. <https://doi.org/10.1021/ja9620604>.
- (2) Yi, J.; Liu, S.; Abu-Omar, M. M. Rhenium-Catalyzed Transfer Hydrogenation and Deoxygenation of Biomass-Derived Polyols to Small and Useful Organics. *ChemSusChem* **2012**, *5* (8), 1401–1404. <https://doi.org/10.1002/cssc.201200138>.
- (3) Raju, S.; Jastrzebski, J. T. B. H.; Lutz, M.; Gebbink, R. J. M. K. Catalytic Deoxydehydration of Diols to Olefins by Using a Bulky Cyclopentadiene-Based Trioxorhenium Catalyst. *ChemSusChem* **2013**, *6* (9), 1673–1680. <https://doi.org/10.1002/cssc.201300364>.
- (4) Liu, S.; Senocak, A.; Smeltz, J. L.; Yang, L.; Wegenhart, B.; Yi, J.; Kenttaemaa, H. I.; Ison, E. A.; Abu-Omar, M. M. Mechanism of MTO-Catalyzed Deoxydehydration of Diols to Alkenes Using Sacrificial Alcohols. *Organometallics* **2013**, *32* (11), 3210–3219. <https://doi.org/10.1021/om400127z>.
- (5) Zhang, H.; Li, X.; Su, X.; Ang, E. L.; Zhang, Y.; Zhao, H. Production of Adipic Acid from Sugar Beet Residue by Combined Biological and Chemical Catalysis. *ChemCatChem* **2016**, *8* (8), 1500–1506. <https://doi.org/10.1002/cctc.201600069>.
- (6) Denning, A. L.; Dang, H.; Liu, Z.; Nicholas, K. M.; Jentoft, F. C. Deoxydehydration of Glycols Catalyzed by Carbon-Supported Perrhenate. *ChemCatChem* **2013**, *5* (12), 3567–3570. <https://doi.org/10.1002/cctc.201300545>.
